# Supplementary material
Source: PubMed Central journal article supplement (PMC10436759)
Supplement: bgad048_suppl_supplementary_materials.pdf [file bgad048_suppl_supplementary_materials.pdf]

## Supplemental data

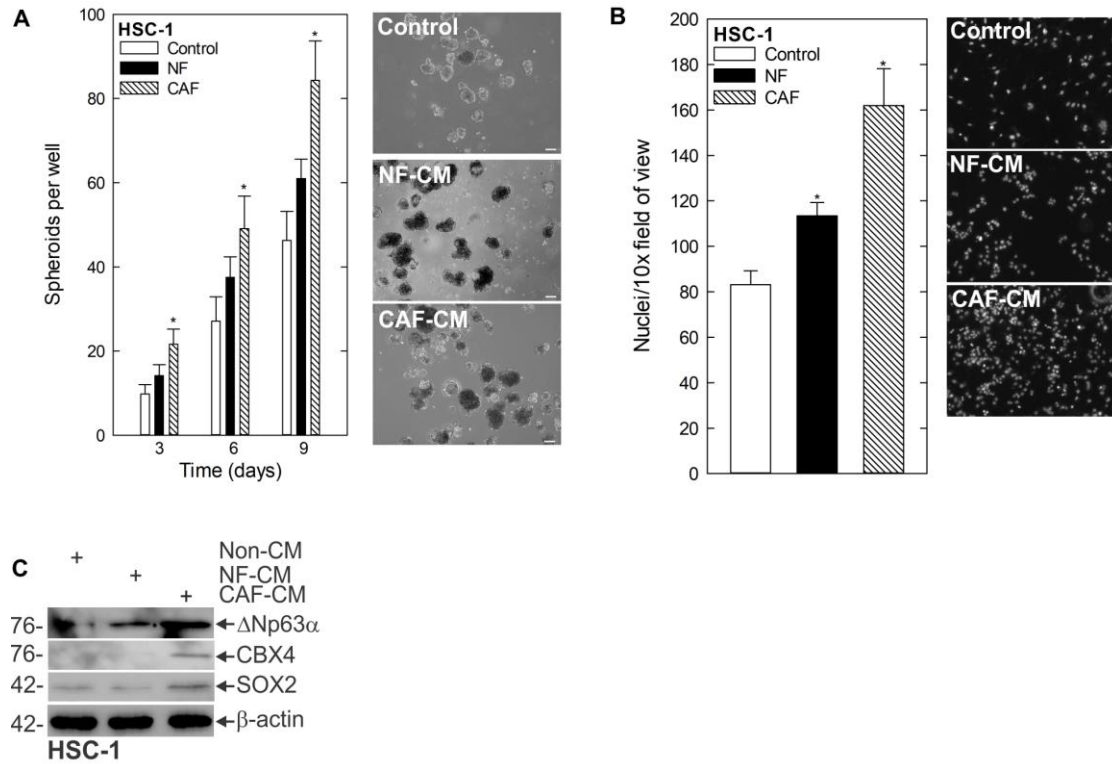

### **Supplemental fig. 1 CAFs stimulate CSC phenotype and CBX4 expression**

**A** HSC-1 monolayer cultures maintained in growth medium were harvested and plated at  $4 \times 10^4$  cells per well in spheroid growth conditions with normal or cancer associated fibroblast conditioned media and spheroid number monitored for 9 days (left). Representative images on day 9 of growth are shown (right). Scale bars, 200  $\mu\text{m}$ . The values are mean  $\pm$  SEM. The asterisks indicate significant difference compared with control. **B** spheroids were trypsinized and single-cell suspensions seeded onto Matrigel-coated membranes in Millicell chambers for invasion assays with normal or cancer associated fibroblast conditioned media in the bottom chamber **C** After 10 days of spheroid growth in normal or cancer associated fibroblast conditioned media, lysates were electrophoresed for detection of the indicated proteins.

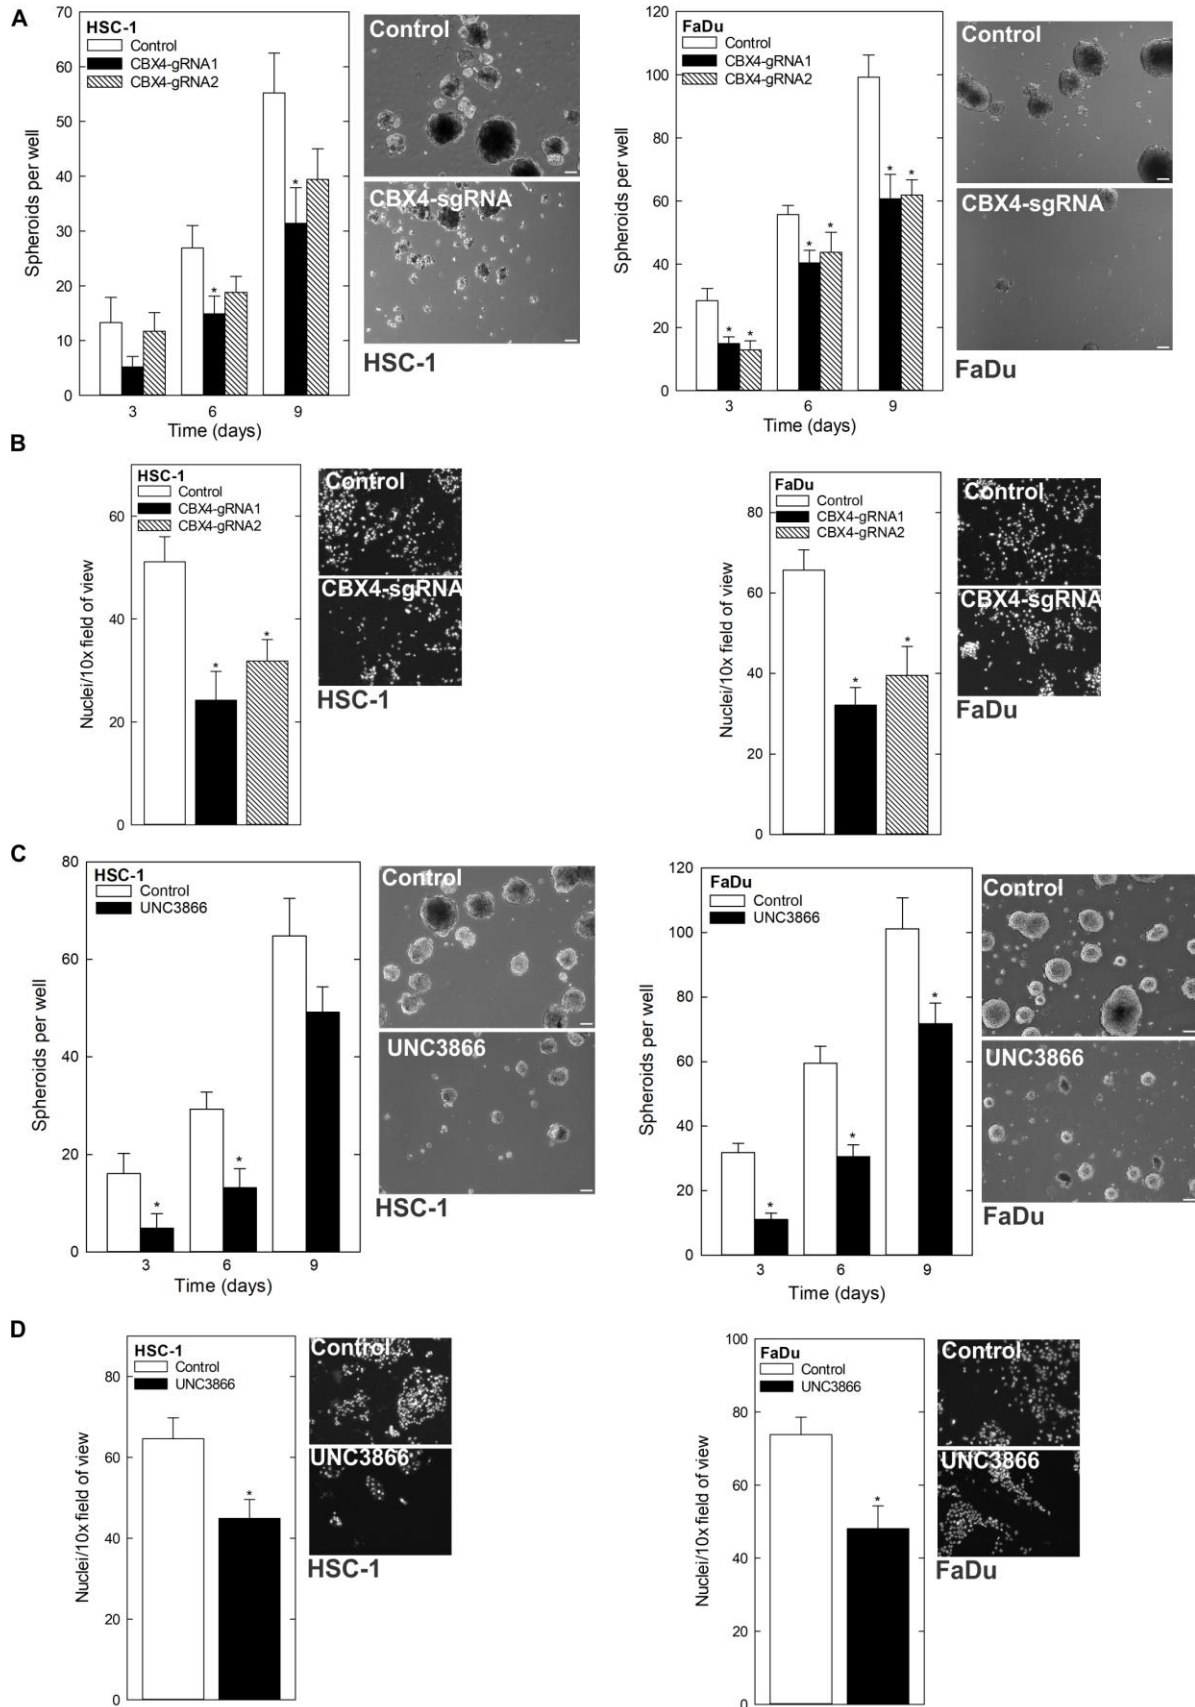

### Supplemental fig. 2 CBX4 regulates the CSC phenotype

**A** HSC-1 or FaDu control empty vector (EV) and CBX4 CRISPR-depleted cells were seeded in spheroid growth conditions and spheroid number monitored for 9 days (left). Representative images on day 9 of growth are shown (right). **B** HSC-1 or FaDu control and CBX4 CRISPR-depleted cells were seeded in Matrigel-coated membranes in Millicell chambers for invasion assays. **C** HSC-1 or FaDu cells ( $4 \times 10^4$ ) were plated in non-adherent 6-well plates, grown for 9 days in spheroid medium, with or without UNC3866 and spheroid numbers were counted over 9 days. The values are mean  $\pm$  SEM. The asterisks indicate significant difference compared with control. Representative spheroid images following a 9-day treatment with 0 or 20 mmol/L UNC3866 are shown. **D** HSC-1 or FaDu spheroids were trypsinized to form single-cell suspensions and reseeded for invasion assays  $\pm$  UNC3866. The values are mean  $\pm$  SEM. The asterisks indicate significant difference compared with control,  $P < 0.05$ .

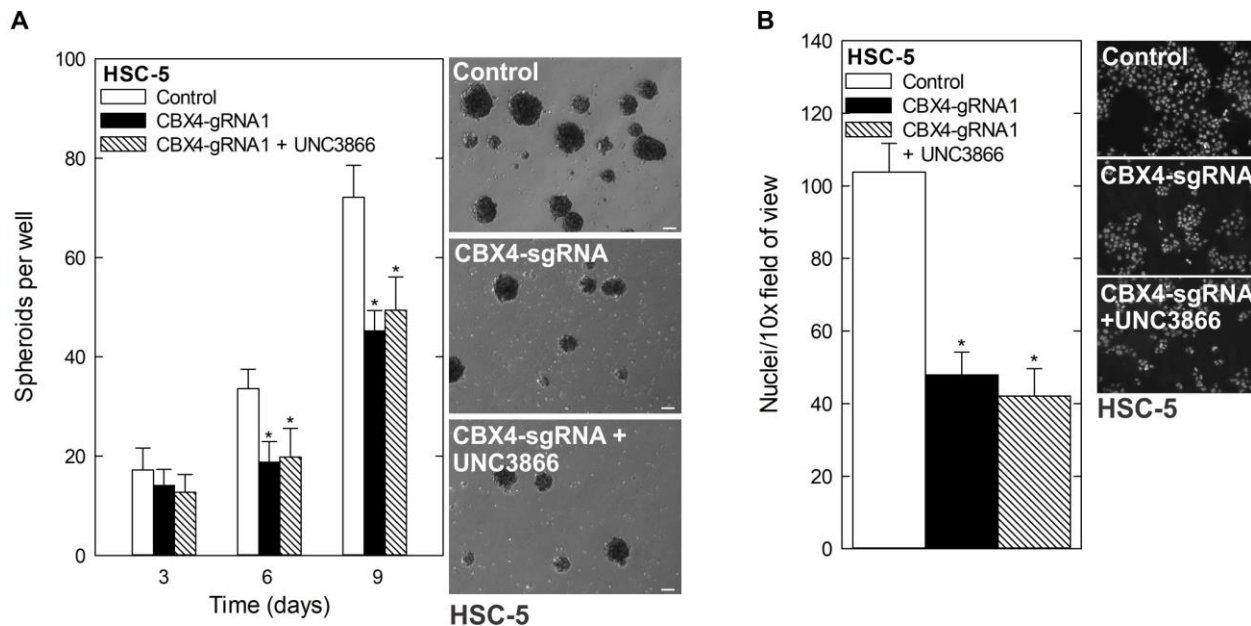

### Supplemental fig. 3 UNC3866 phenotype is independent of CBX7

**A** HSC-5 control empty vector (EV) and CBX4 CRISPR-depleted cells were seeded in spheroid growth conditions  $\pm$  UNC3866 and spheroid number monitored over 9 days of growth. **B** HSC-5 control or CBX4 CRISPR depleted spheroids were trypsinized to form single cell suspensions and then seeded for invasion assays  $\pm$  UNC3866. The values are mean  $\pm$  SEM. The asterisks indicate significant difference compared with control,  $P < 0.05$ .

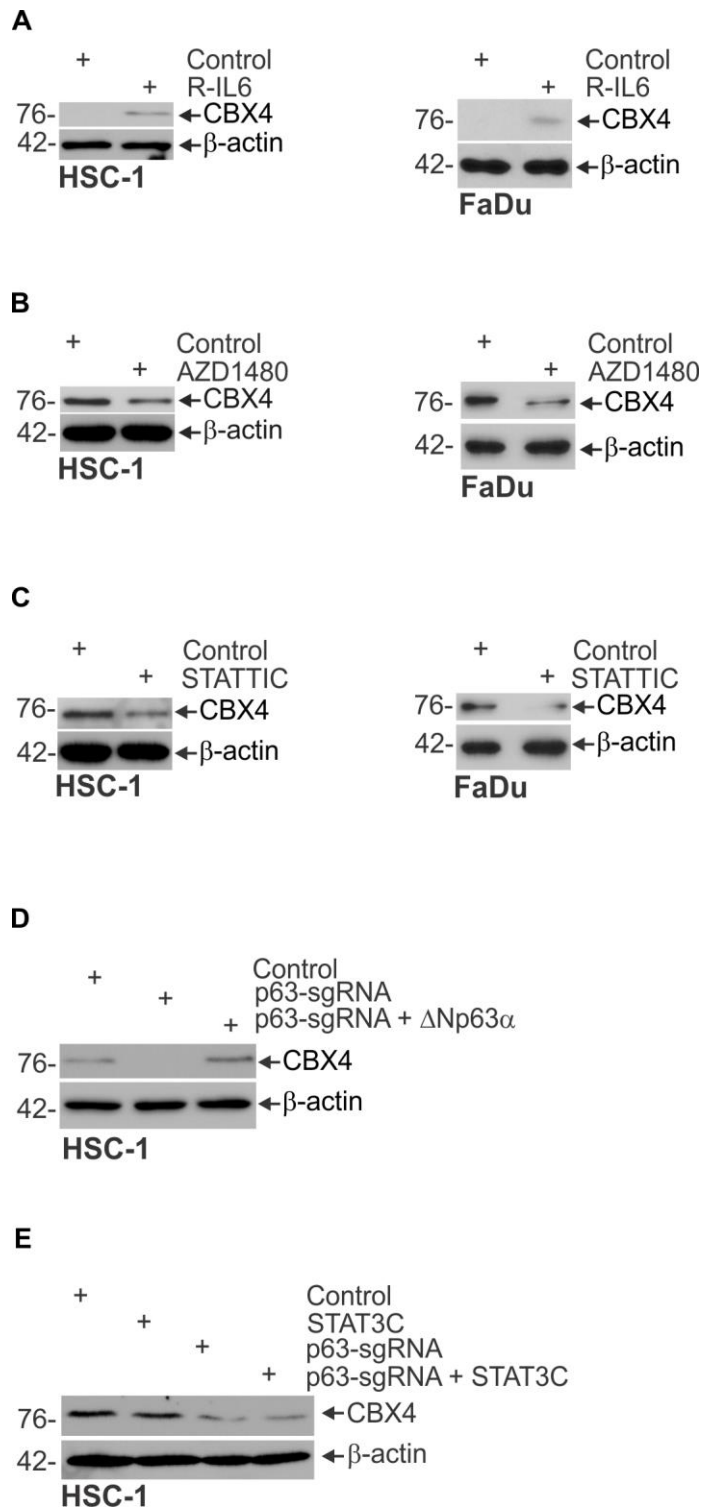

**Supplemental fig. 4 IL-6/JAK/STAT pathway regulates CBX4 expression**

**A** HSC-1 or FaDu spheroids were grown for 8 days then IL-6 was added to the media for 48 h and lysates collected for immunoblot. **B** HSC-1 or FaDu Spheroids were grown in CAF conditioned media and treated with 1  $\mu$ M of the JAK inhibitor AZD1480 and lysates were collected for protein detection of the indicated epitopes. **C** HSC-1 or FaDu Spheroids were

grown in CAF conditioned media and treated with 5  $\mu$ M of the STAT3 inhibitor STATTIC and lysates were collected for western blots of the indicated proteins. **D** HSC-1 Control, p63-sgRNA, and p63-sgRNA +  $\Delta$ Np63 $\alpha$ -expressing cells were harvested for protein for western blot. **E** HSC-1 Control, STAT3C, p63-sgRNA and STAT3C + p63-sgRNA expressing cells were harvested for protein for western blotting of the indicated proteins.
